# Supplementary material for: CroR Regulates Expression of pbp4(5) to Promote Cephalosporin Resistance in Enterococcus faecalis
Source: PubMed Central journal article supplement (PMC9426447; doi:10.1128/mbio.01119-22), 2022-08-01
Supplement: mbio.01119-22-s0004.pdf [file mbio.01119-22-s0004.pdf]

**A** *croR* promoter sequence

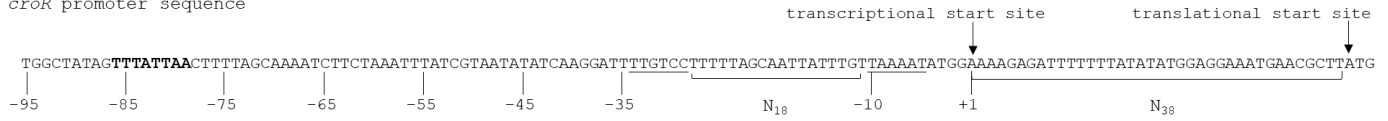

**B** *pbp4(5)* promoter sequence

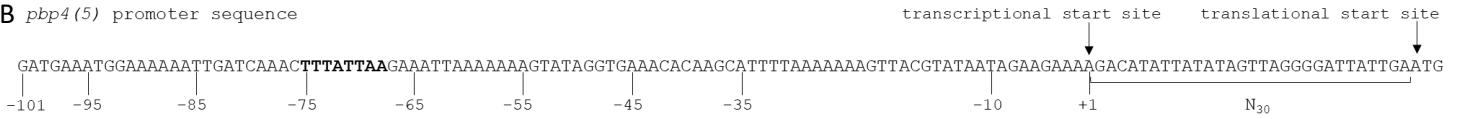

**Supplemental Figure 2. Identification of transcriptional start sites for (A) *croR* and (B) *pbp4(5)* via 5'RACE.** The underlined sequence corresponds to previously published *croR* promoter -35 and -10 sequences (TTGTCC-N<sub>18</sub>-TAAAAT) (Comenge 2003). The **CroR-dependent regulatory motif** identified in this study is shown in bold. N<sub>x</sub> indicates the number (x) of nucleotides (N) within the bracket sequences.
