# Supplementary material for: CroR Regulates Expression of pbp4(5) to Promote Cephalosporin Resistance in Enterococcus faecalis
Source: PubMed Central journal article supplement (PMC9426447; doi:10.1128/mbio.01119-22), 2022-08-01
Supplement: mbio.01119-22-s0007.pdf [file mbio.01119-22-s0007.pdf]

**Supplemental Table 4.** Ceftriaxone resistance of wild-type or  $\Delta croR$  *E. faecalis* strains carrying compatible expression plasmids encoding constitutively expressed *pbp4(5)* and/or nitrate-inducible *pbpA(2b)*.

| Strain/plasmids <sup>a</sup>                                 | Ceftriaxone MIC (ug/ml) <sup>b</sup> |                        |
|--------------------------------------------------------------|--------------------------------------|------------------------|
|                                                              | 0 mM NaNO <sub>3</sub>               | 5 mM NaNO <sub>3</sub> |
| wild-type /                                                  |                                      |                        |
| vector + <i>P<sub>nisA</sub></i> -vector                     | 64                                   | 128                    |
| <i>P-pbp4(5)</i> + <i>P<sub>nisA</sub></i> -vector           | 512                                  | 512                    |
| vector + <i>P<sub>nisA</sub></i> - <i>pbpA(2b)</i>           | 64                                   | 128                    |
| <i>P-pbp4(5)</i> + <i>P<sub>nisA</sub></i> - <i>pbpA(2b)</i> | 512                                  | 512                    |
| $\Delta croR$ /                                              |                                      |                        |
| vector + <i>P<sub>nisA</sub></i> -vector                     | 8                                    | 8                      |
| <i>P-pbp4(5)</i> + <i>P<sub>nisA</sub></i> -vector           | 32                                   | 32                     |
| vector + <i>P<sub>nisA</sub></i> - <i>pbpA(2b)</i>           | 8                                    | 8                      |
| <i>P-pbp4(5)</i> + <i>P<sub>nisA</sub></i> - <i>pbpA(2b)</i> | 32                                   | 16                     |

<sup>a</sup>The strains analyzed were as follows: wild-type *E. faecalis* OG1; and  $\Delta croR$ , SB23. The plasmids analyzed were as follows: vector, pJRG9; *pbp4(5)* overexpression plasmid, pJLL255; nitrate-inducible vector, pJLL286; *pbpA(2b)* nitrate-inducible expression plasmid, pJLL310.

<sup>b</sup>Median MIC is reported from a minimum of 2 independent replicates.
