# Supplementary material for: CroR Regulates Expression of pbp4(5) to Promote Cephalosporin Resistance in Enterococcus faecalis
Source: PubMed Central journal article supplement (PMC9426447; doi:10.1128/mbio.01119-22), 2022-08-01
Supplement: mbio.01119-22-s0008.pdf [file mbio.01119-22-s0008.pdf]

**Supplemental Table 5.** Strains and plasmids used in this study.

| Strain             | Genotype or description                                                                             | Source or reference |
|--------------------|-----------------------------------------------------------------------------------------------------|---------------------|
| Strains            |                                                                                                     |                     |
| <i>E. coli</i>     |                                                                                                     |                     |
| Top10              | Routine cloning host                                                                                | Lab stock           |
| DH5 $\alpha$       | Routine cloning host                                                                                | Lab stock           |
| <i>E. faecalis</i> |                                                                                                     |                     |
| OG1                | Wild-type laboratory strain isolate (MLST 1)                                                        | 1                   |
| SB23               | OG1 $\Delta$ <i>croR</i>                                                                            | 2                   |
| SB35               | OG1 $\Delta$ ( <i>croR croS</i> )                                                                   | 3                   |
| ST4                | OG1 <i>pbp4(5)</i> ATAA promoter mutant (4 nucleotide substitutions: ATAA)                          | This work           |
| JL339              | OG1 $\Delta$ <i>pbp4(5)</i>                                                                         | 4                   |
| V583               | Vancomycin-resistant clinical isolate (MLST 6)                                                      | 5                   |
| CK221              | V583 $\Delta$ <i>ermB</i> (Erm <sup>S</sup> )                                                       | 6                   |
| SB45               | CK221 $\Delta$ <i>croR</i>                                                                          | 7                   |
| ST8                | CK221 <i>pbp4(5)</i> ATAA promoter mutant (4 nucleotide substitutions: ATAA)                        | This work           |
| JL640              | CK221 $\Delta$ <i>pbp4(5)</i>                                                                       | 8                   |
| T1                 | Wild-type (MLST 21), CDC reference strain                                                           | 9                   |
| SB29               | T1 $\Delta$ <i>croR</i>                                                                             | 6                   |
| JL632              | OG1 $\Delta$ <i>pbpA(2b)</i>                                                                        | 8                   |
| SB77               | OG1 $\Delta$ OG1RF_RS05215                                                                          | This work           |
| SK129              | OG1 $\Delta$ OG1RF_RS12755                                                                          | This work           |
| SB93               | OG1 $\Delta$ OG1RF_RS02555                                                                          | This work           |
| 8N14               | OG1RF OG1RF_RS03660:: <i>Tn</i>                                                                     | 10                  |
| 13D12              | OG1RF OG1RF_RS05550:: <i>Tn</i>                                                                     | 10                  |
| 2M10               | OG1RF OG1RF_RS05565:: <i>Tn</i>                                                                     | 10                  |
| 7B1                | OG1RF OG1RF_RS05385:: <i>Tn</i>                                                                     | 10                  |
| 25M20              | OG1RF OG1RF_RS05555:: <i>Tn</i>                                                                     | 10                  |
| Plasmids           |                                                                                                     |                     |
| pCI3340            | <i>E. coli</i> - <i>E. faecalis</i> shuttle vector (Cm <sup>r</sup> )                               | 11                  |
| pSLK234            | Promoterless <i>lacZ</i> in pCI3340                                                                 | 12                  |
| pJLL170            | <i>P<sub>croR</sub>'-lacZ</i> in pCI3340 (includes 240bp upstream of the translational start site)  | 12                  |
| pSBT3              | <i>P<sub>pbp2</sub>'-lacZ</i> in pCI3340 (includes 400bp upstream of the translational start site)  | This work           |
| pSBT8              | <i>P<sub>pbp5</sub>'-lacZ</i> in pCI3340 (includes 154bp upstream of the translational start site)  | This work           |
| pJRG8              | <i>E. faecalis</i> expression vector (Erm <sup>r</sup> )                                            | 13                  |
| pJLL59             | <i>P<sub>croR</sub>-croR croS</i> in pJRG8                                                          | 3                   |
| pSLB1              | <i>P<sub>croR</sub>-croR D52A croS</i> in pJRG8                                                     | 3                   |
| pSBT23             | <i>P<sub>pbp5</sub>'-lacZ</i> in pCI3340 (includes 130bp upstream of the translational start site)  | This work           |
| pSBT24             | <i>P<sub>pbp5</sub>'-lacZ</i> in pCI3340 (includes 120bp upstream of the translational start site)  | This work           |
| pSBT25             | <i>P<sub>pbp5</sub>'-lacZ</i> in pCI3340 (includes 105bp upstream of the translational start site)  | This work           |
| pSBT26             | <i>P<sub>pbp5</sub>'-lacZ</i> in pCI3340 (includes 90bp upstream of the translational start site)   | This work           |
| pSBT29             | pSBT25 with 8 nucleotide substitutions <b>AAATAATT</b> in CroR-dependent regulatory motif TTTATTAA  | This work           |
| pSBT30             | pSBT25 with 6 nucleotide substitutions <b>TAATAATA</b> in CroR-dependent regulatory motif TTTATTAA  | This work           |
| pSBT31             | pSBT25 with 4 nucleotide substitutions <b>TTATAAAA</b> in CroR-dependent regulatory motif TTTATTAA  | This work           |
| pSBT38             | pJLL170 with 8 nucleotide substitutions <b>AAATAATT</b> in CroR-dependent regulatory motif TTTATTAA | This work           |
| pJH086             | <i>E. faecalis</i> allelic exchange vector (Cm <sup>r</sup> ); <i>pheS</i> * counterselection       | 14                  |
| pSBT40             | <i>pbp4(5)</i> promoter from OG1 with 4 nucleotide substitutions (ATAA) in pJH086                   | This work           |

|         |                                                                                                                 |           |
|---------|-----------------------------------------------------------------------------------------------------------------|-----------|
| pSBT64  | <i>bbp4(5)</i> promoter from CK221 with 4 nucleotide substitutions (ATAA) in pJH086                             | This work |
| pJRG9   | <i>E. faecalis</i> expression vector with constitutive P23s promoter (Cm <sup>r</sup> )                         | 2         |
| pJLL255 | <i>bbp4(5)</i> from OG1 in pJRG9                                                                                | This work |
| pCPN1   | <i>OG1RF_RS05560</i> in pJRG9                                                                                   | This work |
| pJH123  | <i>E. faecalis</i> expression vector with constitutive P23s promoter (Cm <sup>r</sup> )                         | 13        |
| pSLK245 | <i>OG1RF_RS05565-HA</i> with C-terminal HA tag in pJH123                                                        | This work |
| pEAW9   | <i>bbpA(2b)</i> from OG1 in pJRG9                                                                               | 8         |
| pSLK239 | <i>OG1RF_RS11270-HA</i> with C-terminal HA tag in pJH123                                                        | This work |
| pSLK238 | <i>OG1RF_RS05340-HA</i> with C-terminal HA tag in pJH123                                                        | This work |
| pSLK237 | <i>OG1RF_RS03825-HA</i> with C-terminal HA tag in pJH123                                                        | This work |
| pSLK241 | <i>OG1RF_RS07205-HA</i> with C-terminal HA tag in pJH123                                                        | This work |
| pSLK243 | <i>OG1RF_RS03660-HA</i> with C-terminal HA tag in pJH123                                                        | This work |
| pSLK244 | <i>OG1RF_RS05215-HA</i> with C-terminal HA tag in pJH123                                                        | This work |
| pSLK250 | <i>OG1RF_RS12755-HA</i> with C-terminal HA tag in pJH123                                                        | This work |
| pCJK245 | <i>E. faecalis</i> allelic exchange vector (Cm <sup>r</sup> )                                                   | 15        |
| pSLB72  | $\Delta OG1RF\_RS05215$ ( $\Delta L7$ -T268, 95% deletion) in pCJK245                                           | This work |
| pSLB90  | $\Delta OG1RF\_RS02555$ ( $\Delta K7$ -D380, 96% deletion) in pCJK245                                           | This work |
| pSLK233 | $\Delta OG1RF\_RS12755$ ( $\Delta K7$ -K532, 97% deletion) in pJH086                                            | This work |
| pJLL286 | <i>E. faecalis</i> expression vector with <i>P<sub>nisA</sub></i> nitrate-inducible promoter (Em <sup>r</sup> ) | 16        |
| pJLL310 | <i>bbpA(2b)</i> from OG1 in pJLL286                                                                             | This work |

## Supplemental references

1. Gold, O. G., Jordan, H. V. & van Houte, J. The prevalence of enterococci in the human mouth and their pathogenicity in animal models. *Arch. Oral Biol.* **20**, 473-IN15 (1975).
2. Snyder, H., Kellogg, S. L., Skarda, L. M., Little, J. L. & Kristich, C. J. Nutritional Control of Antibiotic Resistance via an Interface between the Phosphotransferase System and a Two-Component Signaling System. *Antimicrob. Agents Chemother.* **58**, 957–965 (2014).
3. Kellogg, S. L. & Kristich, C. J. Functional Dissection of the CroRS Two-Component System Required for Resistance to Cell Wall Stressors in *Enterococcus faecalis*. *J. Bacteriol.* **198**, 1326–1336 (2016).
4. Kristich, C. J. & Little, J. L. Mutations in the  $\beta$  Subunit of RNA Polymerase Alter Intrinsic Cephalosporin Resistance in Enterococci. *Antimicrob. Agents Chemother.* **56**, 2022 (2012).
5. Sahm, D. F. *et al.* In vitro susceptibility studies of vancomycin-resistant *Enterococcus faecalis*. *Antimicrob. Agents Chemother.* **33**, 1588 (1989).
6. Djorić, D. & Kristich, C. J. Extracellular SalB contributes to intrinsic cephalosporin resistance and cell envelope integrity in *Enterococcus faecalis*. *J. Bacteriol.* (2017) doi:10.1128/JB.00392-17.
7. Djorić, D. & Kristich, C. J. Oxidative Stress Enhances Cephalosporin Resistance of *Enterococcus faecalis* through Activation of a Two-Component Signaling System. *Antimicrob. Agents Chemother.* (2015) doi:10.1128/aac.03984-14.
8. Djorić, D., Little, J. L. & Kristich, C. J. Multiple low-reactivity class B penicillin-binding proteins are required for cephalosporin resistance in enterococci. *Antimicrob. Agents Chemother.* **64**, (2020).
9. Maekawa, S., Yoshioka, M. & Kumamoto, Y. Proposal of a New Scheme for the Serological Typing of *Enterococcus faecalis* Strains. *Microbiol. Immunol.* **36**, 671–681 (1992).
10. Kristich, C. J. *et al.* Development and Use of an Efficient System for Random mariner Transposon Mutagenesis To Identify Novel Genetic Determinants of Biofilm Formation in the Core *Enterococcus faecalis* Genome. *Appl. Environ. Microbiol.* **74**, 3377 (2008).
11. Hayes, F., Daly, C. & Fitzgerald, G. F. Identification of the Minimal Replicon of *Lactococcus lactis* subsp. *lactis* UC317 Plasmid pCI305. *Appl. Environ. Microbiol.* **56**, 202 (1990).
12. Kellogg, S. L. & Kristich, C. J. Convergence of PASTA kinase and two component signaling in response to cell wall stress in *Enterococcus faecalis*. *J. Bacteriol.* (2018) doi:10.1128/JB.00086-18.

13. Kristich, C. J., Little, J. L., Hall, C. L. & Hoff, J. S. Reciprocal Regulation of Cephalosporin Resistance in *Enterococcus faecalis*. *MBio* **2**, (2011).
14. Kellogg, S. L., Little, J. L., Hoff, J. S. & Kristich, C. J. Requirement of the CroRS two-component system for resistance to cell wall-targeting antimicrobials in *Enterococcus faecium*. *Antimicrob. Agents Chemother.* (2017) doi:10.1128/AAC.02461-16.
15. Kristich, C. J., Djoric, D. & Little, J. L. Genetic Basis for Vancomycin-Enhanced Cephalosporin Susceptibility in Vancomycin-Resistant Enterococci Revealed Using Counterselection with Dominant-Negative Thymidylate Synthase. (2014) doi:10.1128/AAC.02001-13.
16. Mascari, C. A., Djoric, D., Little, J. L. & Kristich, C. J. Use of an Interspecies Chimeric Receptor for Inducible Gene Expression Reveals that Metabolic Flux through the Peptidoglycan Biosynthesis Pathway is an Important Driver of Cephalosporin Resistance in *Enterococcus faecalis*. *J. Bacteriol.* **204**, (2022).
