# Supplementary material for: CroR Regulates Expression of pbp4(5) to Promote Cephalosporin Resistance in Enterococcus faecalis
Source: PubMed Central journal article supplement (PMC9426447; doi:10.1128/mbio.01119-22), 2022-08-01
Supplement: mbio.01119-22-s0009.pdf [file mbio.01119-22-s0009.pdf]

**Supplemental Table 6.** Primers used in this study.

| Primer Name            | 5' - 3' sequence               | Use    | Source or reference |
|------------------------|--------------------------------|--------|---------------------|
| croR SP1 ST            | CACCCGAGCCATTACTTCTAAAGGATTG   | 5'RACE | This work           |
| croR SP2 ST            | GACATAATCGTCTGCACCAGCAACTAAG   | 5'RACE | This work           |
| croR SP3 ST            | CCATATCGGTTGTTTTGCTGTTAAC      | 5'RACE | This work           |
| pbp5 SP1 ST            | CATCACTAGCTTTGACTCCTTCTGC      | 5'RACE | This work           |
| pbp5 SP2 ST            | GAATCCCTGAATAAATTGCTTGG        | 5'RACE | This work           |
| pbp5 SP3 ST            | CTTTAAGCTAGCTTCTTGAACAACGGACGG | 5'RACE | This work           |
| ST RTqPCR 16S rRNA FWD | CAAGCGTTGTCCGGATTTATTG         | qPCR   | This work           |
| ST RTqPCR 16S rRNA REV | GCACTCAAGTCTCCCAGTTT           | qPCR   | This work           |
| SK pbp5_Set1_F         | GTATCTTTTGTGCGAGCCCC           | qPCR   | This work           |
| SK pbp5_Set1_R         | GTGTTTGATGAAGTGGGCGT           | qPCR   | This work           |
